# Supplementary material
Source: publisher figshare collection journal article supplement (https://tandf.figshare.com/ndownloader/files/13152464)
Supplement: Supplementary file 1 [file 13152464]

## Supplementary Information

### Surface-enhanced Raman on gold nanoparticles for the identification of the most common adulterant of Astragali Radix

Hongxin Lin<sup>1,4</sup>, Ying Chen<sup>2,4</sup>, Shangyuan Feng<sup>1</sup>, Weiwei Chen<sup>3</sup>, Duo Lin<sup>3</sup>, Hao Huang<sup>3</sup>, JiaLin<sup>1</sup>, Rong Chen<sup>1</sup>, GuannanChen<sup>1,5</sup>, and Yun Yu<sup>3,6</sup>

<sup>1</sup> Key Laboratory of Optoelectronic Science and Technology for Medicine, Ministry of Education, Fujian Normal University, Fuzhou, Fujian, China

<sup>2</sup> Provincial Clinical College of Fujian Medical University, Fuzhou, Fujian, China

<sup>3</sup> Fujian University of Traditional Chinese Medicine, Fuzhou, Fujian, China

<sup>4</sup> These authors contributed equally to the work.

<sup>5</sup> Correspondence to: E-mail: [edado@fjnu.edu.cn](mailto:edado@fjnu.edu.cn)

<sup>6</sup> Correspondence to: E-mail: [yuyunsatan@163.com](mailto:yuyunsatan@163.com)

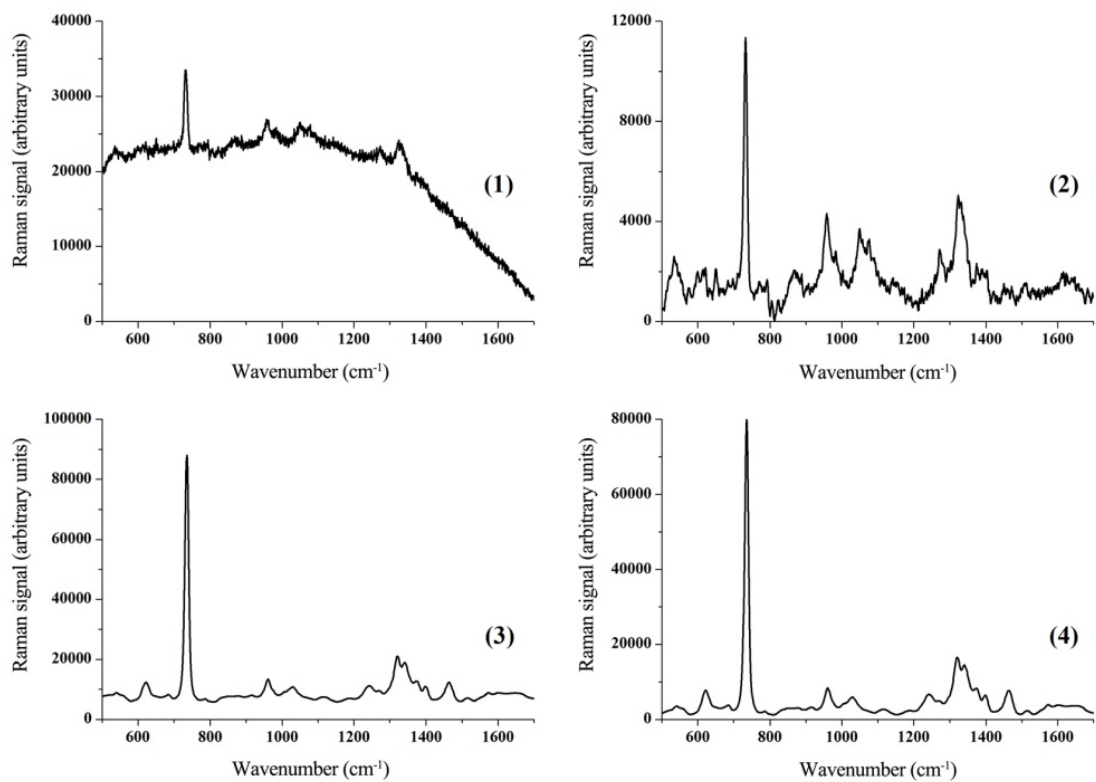

Figure S1. The raw spectra of Astragali Radix sample without (spectrum 1) and with gold nanoparticles (spectrum 3). The spectra of Astragali Radix sample without (spectrum 2) and with gold nanoparticles (spectrum 4) after removing fluorescence background.

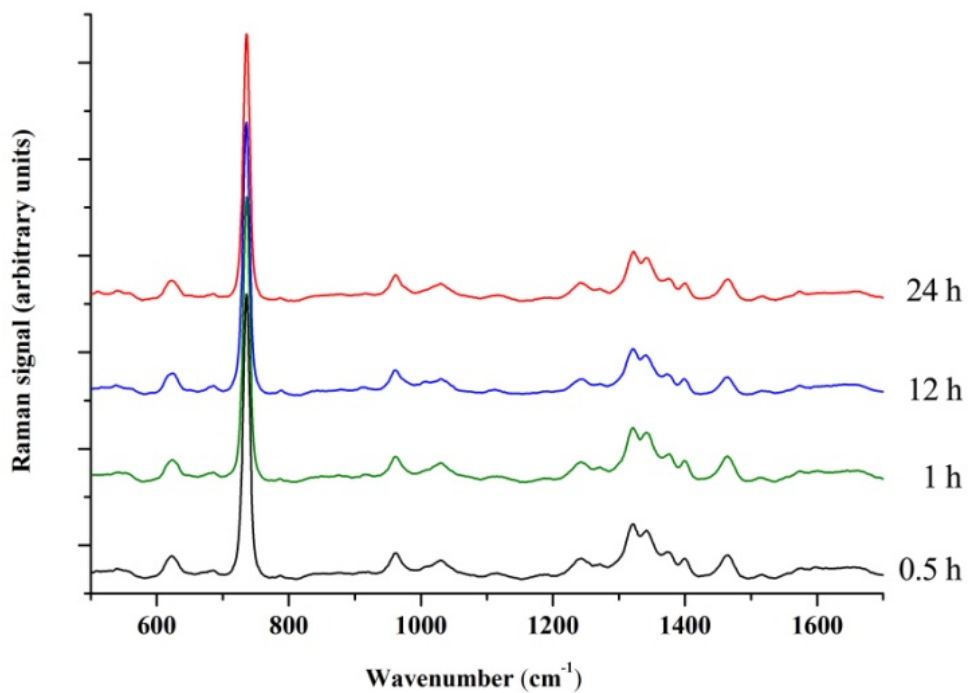

Figure S2. SERS spectra of a same sample measured at different time.

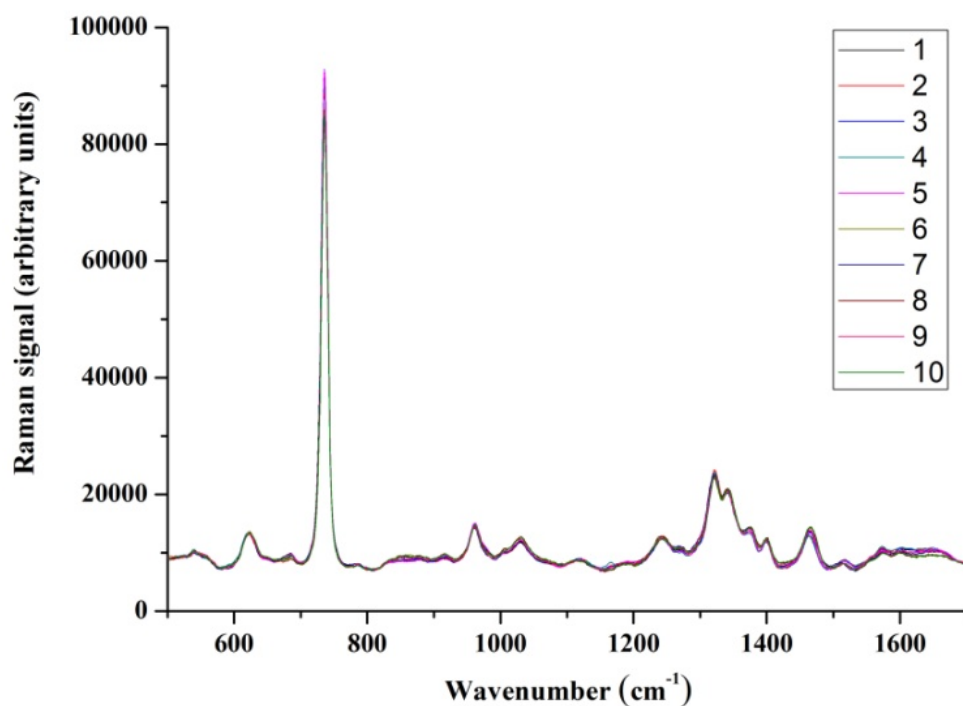

Figure S3. Ten SERS spectra obtained in one batch from one sample.

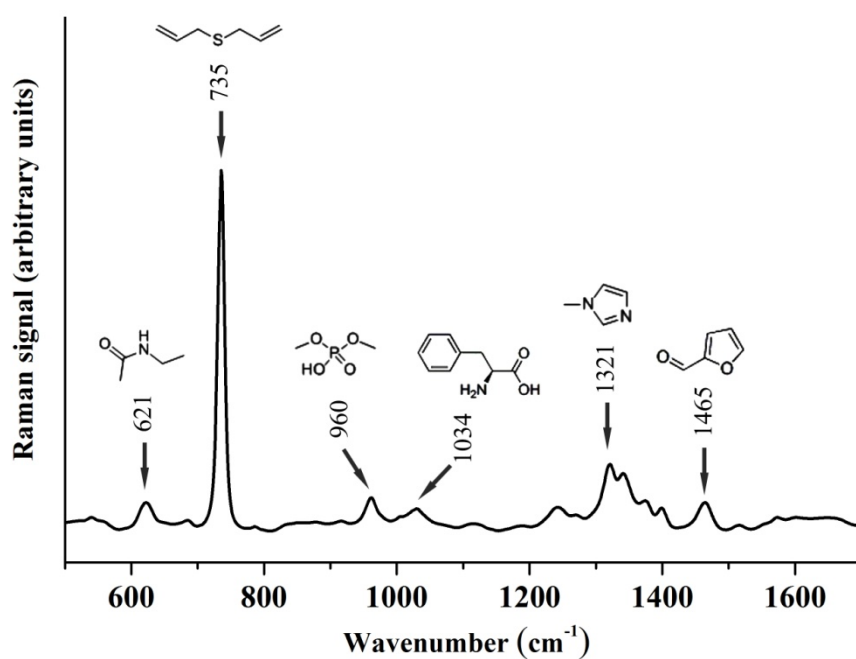

Figure S4. The SERS spectrum of Astragali Radix. The inserted molecule structures show the main chemical components in the herbs.
